# Supplementary material for: Amyloid Beta Pathology Exacerbates Weight Loss and Brain Cytokine Responses following Low-Dose Lipopolysaccharide in Aged Female Tg2576 Mice
Source: MDPI journal article supplement (doi:10.3390/ijms23042377), 2022-02-21
Supplement: s1 [file s1]

# Supporting Information

## Amyloid beta pathology exacerbates weight loss and brain cytokine responses following low-dose lipopolysaccharide in aged female Tg2576 mice

Rachel C. Knopp <sup>1,2</sup>, Kristen K. Baumann <sup>1</sup>, Miranda L. Wilson <sup>1</sup>, William A. Banks <sup>1,2</sup>, Michelle A. Erickson <sup>1,2\*</sup>

<sup>1</sup> Geriatrics Research Education and Clinical Center, Veterans Affairs Puget Sound Health Care System, Seattle, WA, 98108 USA

<sup>2</sup> Division of Gerontology and Geriatric Medicine, Department of Medicine, University of Washington School of Medicine, Seattle, WA, 98195 USA

\* Correspondence: VA Puget Sound Healthcare System, 1660 S. Columbian Way, S-182 Seattle, WA USA 98108; mericks9@uw.edu; Tel.: 1-206-277-1049

# Table S1

| <b>Cause of death</b>                                        | <b>WT</b> | <b>Tg2576</b> |
|--------------------------------------------------------------|-----------|---------------|
| Unknown- found dead in cage                                  | 1         | 3             |
| Euthanized- bloating with verified tumors or enlarged spleen | 4         | 3             |
| Euthanized- weight loss, tremors, lethargy without tumors    | 2         | 2             |

Table S1. Death and endpoint criteria in non-survivor mice. Numbers reflect the number of mice in each group, out of 19 total mice in the WT group and 20 in the Tg2576 group.

# Figure S1

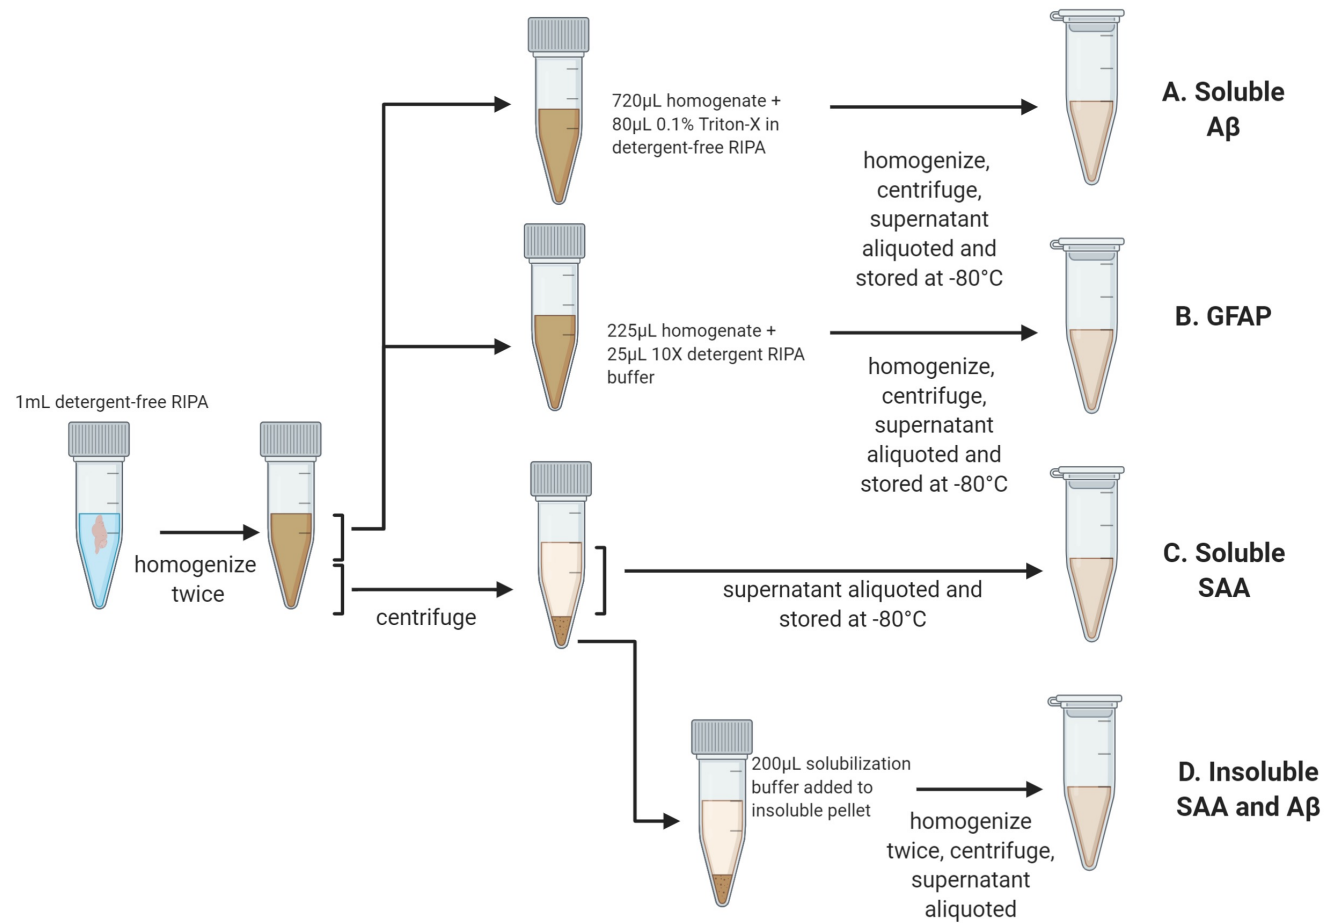

Figure S1. Schematic for extraction of brain tissues for this study. Created with BioRender.com.

# Table S2

| Cytokine | WT/Sal | WT/LPS | Tg/Sal | Tg/LPS |
|----------|--------|--------|--------|--------|
| G-CSF    | 2      | 0      | 2      | 0      |
| IL-5     | 0      | 0      | 1      | 0      |
| IL-6     | 0      | 1      | 0      | 0      |
| IL-13    | 1      | 1      | 3      | 0      |

Table 2. Samples with cytokine readings that were either extrapolated from the standard curve (n=12) or were assigned a zero value (n=2).
